# Supplementary material for: A validation of Illumina EPIC array system with bisulfite-based amplicon sequencing
Source: PubMed Central journal article supplement (PMC7881719; doi:10.7717/peerj.10762), 2021-02-10
Supplement: peerj-09-10762-s001.pdf [file peerj-09-10762-s001.pdf]

Supplementary Table 1- The Christchurch Health and Developmental Study cohort selected for analysis by BSAS. Cases = cannabis and tobacco users; Controls = never cannabis users.

|                         | Cases | Controls |
|-------------------------|-------|----------|
| Individuals             | n=44  | n=38     |
| Gender                  |       |          |
| Male                    | 84%   | 76%      |
| Female                  | 16%   | 24%      |
| Ethnicity               |       |          |
| European                | 73%   | 89%      |
| Other                   | 27%   | 11%      |
| Socioeconomic status    |       |          |
| Professional/managerial | 20%   | 37%      |
| Clerical/technical      | 41%   | 39%      |
| Semi-skilled/unskilled  | 39%   | 24%      |
| Tobacco smoking status  |       |          |
| Never                   | 9%    | 92%      |
| Occasional              | 4%    | 3%       |
| Regular                 | 87%   | 5%       |
