# Supplementary material for: A validation of Illumina EPIC array system with bisulfite-based amplicon sequencing
Source: PubMed Central journal article supplement (PMC7881719; doi:10.7717/peerj.10762), 2021-02-10
Supplement: peerj-09-10762-s002.pdf [file peerj-09-10762-s002.pdf]

Supplementary Table 2- Forward and reverse primers used to target validation sites using bisulfite amplicon sequencing CpG sites including an Illumina overhang sequence

| Primer name  | Illumina probe ID | Bisulfite converted primer (including Illumina overhang sequence) |
|--------------|-------------------|-------------------------------------------------------------------|
| SLC17A7_F    | Cg 02624701       | TCGTCGGCAGCGTCAGATGTGTATAAGAGACAGGTATTAGAAGATTTYGAAGTTGTTT        |
| SLC17A7_R    | Cg 02624701       | GTCTCGTGGGCTCGGAGATGTGTATAAGAGACAGAAAATAAACCTATTCTCTCC            |
| AHRR_F       | Cg 05575921       | TCGTCGGCAGCGTCAGATGTGTATAAGAGACAGGTTTTTTTTGGTGTGGTTTTA            |
| AHRR_R       | Cg 05575921       | GTCTCGTGGGCTCGGAGATGTGTATAAGAGACAG ACCACCATCTTATCTTATTT           |
| ITPR1_F      | Cg 08987995       | TCGTCGGCAGCGTCAGATGTGTATAAGAGACAG GATGGAATTTATTAGTGTTT            |
| ITPR1_R      | Cg 08987995       | GTCTCGTGGGCTCGGAGATGTGTATAAGAGACAGTAAAACACAACCCATTATCT            |
| MAGI2_F      | Cg 21121803       | TCGTCGGCAGCGTCAGATGTGTATAAGAGACAGAGTTTAATTGAGTGTTTTTGAGG          |
| MAGI2_R      | Cg 21121803       | GTCTCGTGGGCTCGGAGATGTGTATAAGAGACAG ACCCATTTTTATTATACCTTT          |
| EHMT2_F      | Cg 07829740       | TCGTCGGCAGCGTCAGATGTGTATAAGAGACAG AGAGGGGTTTAAATTTAAGTTTG         |
| EHMT2_R      | Cg 07829740       | GTCTCGTGGGCTCGGAGATGTGTATAAGAGACAG CTAATAAATCACATATCTCC           |
| PPM1L_F      | Cg 26406186       | TCGTCGGCAGCGTCAGATGTGTATAAGAGACAG AATGTTAGTTGAATAAGTGG            |
| PPM1L_R      | Cg 26406186       | GTCTCGTGGGCTCGGAGATGTGTATAAGAGACAGCCACAAAATACTCTAAAAAC            |
| DPP10_F      | Cg 05868547       | TCGTCGGCAGCGTCAGATGTGTATAAGAGACAG TTAAGGGAAGAAAGAAATGT            |
| DPP10_R      | Cg 05868547       | GTCTCGTGGGCTCGGAGATGTGTATAAGAGACAGCCTCTATAACAACATTTACTCAA         |
| NIPAL4_F     | Cg 17695979       | TCGTCGGCAGCGTCAGATGTGTATAAGAGACAGGTTGGGAGAATTTATTTTTAGAG          |
| NIPAL4_R     | Cg 17695979       | GTCTCGTGGGCTCGGAGATGTGTATAAGAGACAGATATACCTATCACCAACTTC            |
| CHD7_F       | Cg 19926587       | TCGTCGGCAGCGTCAGATGTGTATAAGAGACAG TTTTAAAAGGATTTAAGGTAATG         |
| CHD7_R       | Cg 19926587       | GTCTCGTGGGCTCGGAGATGTGTATAAGAGACAGACTAACACAAAACAACCCAAT           |
| PRDM5_F      | Cg 01118724       | TCGTCGGCAGCGTCAGATGTGTATAAGAGACAGATTTAAAAATGGTTGTGGTGAAG          |
| PRDM5_R      | Cg 01118724       | GTCTCGTGGGCTCGGAGATGTGTATAAGAGACAGTCCACTCATTACTCATATACTA          |
| Cg11977356_F | Cg 11977356       | TCGTCGGCAGCGTCAGATGTGTATAAGAGACAGGGAGGTGAGATGTTTTAATAATT          |
| Cg11977356_R | Cg 11977356       | GTCTCGTGGGCTCGGAGATGTGTATAAGAGACAGAATAAACTATAATCATACCCCTC         |
| Cg09078959_F | Cg 09078959       | TCGTCGGCAGCGTCAGATGTGTATAAGAGACAGGTTTGAAAAGGGGAAATTTA             |
| Cg09078959_R | Cg 09078959       | GTCTCGTGGGCTCGGAGATGTGTATAAGAGACAGACTTAATAAAAACACCAATC            |
| Cg00571101_F | Cg 00571101       | TCGTCGGCAGCGTCAGATGTGTATAAGAGACAGTGATAGGATATAAGAAGAAAGTA          |
| Cg00571101_R | Cg 00571101       | GTCTCGTGGGCTCGGAGATGTGTATAAGAGACAGTCTACTTCAACCTAAAACAA            |
| Cg11293828_F | Cg 11293828       | TCGTCGGCAGCGTCAGATGTGTATAAGAGACAGTAGGGGGTTAGAGTATTTATTTT          |
| Cg11293828_R | Cg 11293828       | GTCTCGTGGGCTCGGAGATGTGTATAAGAGACAGTTTTACTTTACTTAACTTCTCCC         |
| Cg01614625_F | Cg 01614625       | TCGTCGGCAGCGTCAGATGTGTATAAGAGACAGATGGAATTAGAAATTTTGGG             |
| Cg01614625_R | Cg 0161462        | GTCTCGTGGGCTCGGAGATGTGTATAAGAGACAG CCTCTCCATTTTATTTCTTTAA         |
